# Supplementary material for: Identifying Predictors of Changes in Physical Activity Level in Adolescence: A Prospective Analysis in Bosnia and Herzegovina
Source: MDPI journal article supplement (doi:10.3390/ijerph16142573), 2019-07-18
Supplement: s1 [file s1]

**Supplementary table 1.** Frequencies for studied variables

|                                 | Total |       | Females |       | Males |       |
|---------------------------------|-------|-------|---------|-------|-------|-------|
|                                 | F     | %     | F       | %     | F     | %     |
| Urban/Rural                     |       |       |         |       |       |       |
| Rural                           | 548   | 62.8% | 252     | 62.4% | 288   | 62.6% |
| Urban                           | 324   | 37.2% | 152     | 37.6% | 172   | 37.4% |
| Socioeconomic status            |       |       |         |       |       |       |
| Below average                   | 14    | 1.6%  | 2       | 0.5%  | 12    | 2.6%  |
| Average                         | 812   | 93.1% | 390     | 96.5% | 414   | 90.0% |
| Above average                   | 46    | 5.3%  | 12      | 3.0%  | 34    | 7.4%  |
| Paternal education              |       |       |         |       |       |       |
| Elementary school               | 64    | 7.3%  | 42      | 10.4% | 22    | 4.8%  |
| High school                     | 636   | 72.9% | 292     | 72.3% | 336   | 73.0% |
| College level                   | 96    | 11.0% | 40      | 9.9%  | 56    | 12.2% |
| University level                | 76    | 8.7%  | 30      | 7.4%  | 46    | 10.0% |
| Maternal education              |       |       |         |       |       |       |
| Elementary school               | 266   | 30.5% | 150     | 37.1% | 116   | 25.2% |
| High school                     | 495   | 56.8% | 212     | 52.5% | 283   | 61.5% |
| College level                   | 50    | 5.7%  | 22      | 5.4%  | 28    | 6.1%  |
| University level                | 61    | 7.0%  | 26      | 6.4%  | 35    | 7.6%  |
| Smoking                         |       |       |         |       |       |       |
| Never smoked                    | 580   | 66.5% | 280     | 69.3% | 294   | 63.9% |
| Quitted                         | 44    | 5.0%  | 14      | 3.5%  | 28    | 6.1%  |
| From time to time but not daily | 160   | 18.3% | 74      | 18.3% | 86    | 18.7% |
| Daily smoking (< 10 cigs)       | 42    | 4.8%  | 20      | 5.0%  | 22    | 4.8%  |
| Daily smoking (> 10 cigs)       | 46    | 5.3%  | 16      | 4.0%  | 30    | 6.5%  |
| AUDIT CAT                       |       |       |         |       |       |       |
| Nonharmful drinking             | 772   | 88.5% | 374     | 92.6% | 390   | 84.8% |
| Harmful drinking                | 100   | 11.5% | 30      | 7.4%  | 70    | 15.2% |
| Illicit drugs                   |       |       |         |       |       |       |
| Nonusers                        | 830   | 95.2% | 390     | 96.5% | 440   | 95.7% |
| Users                           | 34    | 3.9%  | 14      | 3.5%  | 20    | 4.3%  |
| PA_changes                      |       |       |         |       |       |       |
| incline                         | 336   | 38.5% | 146     | 36.1% | 182   | 39.6% |
| decline                         | 536   | 61.5% | 258     | 63.9% | 278   | 60.4% |
